# Supplementary material
Source: HighWire-hosted journal article supplement (https://bmjopen.bmj.com/content/11/6/e045905)
Supplement: inline-supplementary-material-2 [file inline-supplementary-material-2.pdf]

**Participant letter for the "CASTING" clinical trial**

Last Name: \_\_\_\_\_ First Name: \_\_\_\_\_

Date of Birth: \_\_\_\_/\_\_\_\_/\_\_\_\_ Date of End of Treatment: \_\_\_\_/\_\_\_\_/\_\_\_\_

Study Doctor: \_\_\_\_\_

Telephone: \_\_\_\_ \_\_\_\_ \_\_\_\_ \_\_\_\_

Clinical Research Technician: \_\_\_\_\_

Telephone: \_\_\_\_ \_\_\_\_ \_\_\_\_ \_\_\_\_

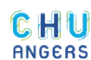

This trial is being carried out by the CHU d'Angers  
from 09/27/2019

version 1

**Contact us as well as your primary care physician / center 15 in case of the following symptoms:**

- Symptoms and signs of phlebitis
  - o Swollen leg and/or leg pain and/or appearance of localized redness and heat
- Symptoms and signs of pulmonary embolism
  - o Difficulty breathing, shortness of breath
  - o Chest pain
  - o Malaise, loss of consciousness
  - o Coughing up blood
